# Supplementary material
Source: PubMed Central journal article supplement (PMC2117166)
Supplement: thorax_thx.2006.067934_1.pdf [file thorax_thx.2006.067934_1.pdf]

Supplementary Table 1: Genomewide linkage analysis for FEV<sub>1</sub> in all subjects, non-smokers (NS), and smokers-only (S). All LOD scores >1 (including empirical p-values) are shown.

| Chromosome | cM  | Pre-bronchodilator |                 |                  | Post-bronchodilator |                  |                  |
|------------|-----|--------------------|-----------------|------------------|---------------------|------------------|------------------|
|            |     | All                | NS              | S                | All                 | NS               | S                |
| 1          | 24  |                    |                 | 1.10<br>(0.020)  |                     |                  | 1.46<br>(0.0097) |
| 1          | 62  |                    |                 |                  |                     |                  | 1.07<br>(0.022)  |
| 1          | 70  |                    |                 |                  | 1.04<br>(0.019)     | 1.33<br>(0.0086) |                  |
| 1          | 84  |                    |                 | 1.30<br>(0.013)  |                     |                  |                  |
| 1          | 175 |                    |                 | 1.87<br>(0.0042) |                     |                  | 1.12<br>(0.020)  |
| 2          | 84  |                    |                 | 1.52<br>(0.0084) |                     |                  |                  |
| 2          | 87  |                    |                 |                  |                     |                  | 2.20<br>(0.0022) |
| 2          | 108 |                    |                 |                  | 1.14<br>(0.015)     |                  |                  |
| 2          | 116 |                    |                 | 1.75<br>(0.0053) |                     |                  |                  |
| 2          | 147 |                    |                 |                  |                     |                  | 1.32<br>(0.013)  |
| 3          | 118 |                    |                 | 1.30<br>(0.013)  |                     |                  |                  |
| 3          | 241 |                    |                 | 2.74<br>(0.0008) |                     |                  |                  |
| 4          | 14  |                    |                 | 1.26<br>(0.014)  |                     |                  | 1.31<br>(0.014)  |
| 4          | 99  |                    |                 |                  |                     |                  | 1.01<br>(0.025)  |
| 4          | 104 |                    |                 | 1.38<br>(0.011)  |                     |                  |                  |
| 4          | 135 | 1.49<br>(0.0059)   | 1.02<br>(0.016) |                  |                     |                  |                  |
| 4          | 138 |                    |                 |                  |                     |                  | 2.66<br>(0.0009) |
| 4          | 140 |                    |                 | 2.70<br>(0.0009) |                     |                  |                  |
| 5          | 54  |                    |                 |                  |                     |                  | 1.19<br>(0.017)  |
| 6          | 49  | 1.01<br>(0.018)    |                 |                  |                     |                  |                  |

|    |     |                  |                 |                  |                  |                  |                  |
|----|-----|------------------|-----------------|------------------|------------------|------------------|------------------|
| 6  | 127 | 1.63<br>(0.0041) |                 |                  |                  |                  |                  |
| 7  | 11  | 1.53<br>(0.0054) |                 |                  |                  |                  |                  |
| 7  | 25  |                  |                 |                  |                  |                  | 1.31<br>(0.016)  |
| 7  | 27  |                  |                 | 1.49<br>(0.0088) |                  |                  |                  |
| 7  | 75  |                  |                 |                  |                  |                  | 1.29<br>(0.014)  |
| 7  | 84  |                  |                 | 1.11<br>(0.020)  |                  |                  |                  |
| 7  | 150 |                  |                 |                  | 2.13<br>(0.0015) | 1.73<br>(0.0031) |                  |
| 8  | 24  |                  |                 | 2.04<br>(0.0029) |                  |                  | 1.96<br>(0.0036) |
| 9  | 153 |                  | 1.09<br>(0.014) |                  |                  |                  |                  |
| 12 | 152 |                  |                 | 1.20<br>(0.016)  |                  |                  | 1.11<br>(0.020)  |
| 13 | 60  |                  |                 |                  |                  | 1.08<br>(0.015)  |                  |
| 14 | 11  |                  |                 |                  |                  |                  | 1.09<br>(0.021)  |
| 14 | 46  |                  |                 | 1.39<br>(0.011)  |                  |                  | 2.05<br>(0.0029) |
| 14 | 65  |                  |                 |                  |                  | 1.09<br>(0.015)  |                  |
| 15 | 127 |                  |                 |                  |                  |                  | 1.15<br>(0.019)  |
| 15 | 134 |                  |                 |                  | 1.69<br>(0.0043) |                  |                  |
| 16 | 69  | 1.06<br>(0.016)  |                 |                  | 1.10<br>(0.016)  |                  |                  |
| 16 | 115 | 1.02<br>(0.017)  |                 |                  |                  |                  |                  |
| 20 | 26  |                  |                 |                  |                  |                  | 1.33<br>(0.013)  |

Supplementary Table 2: Genomewide linkage analysis for FEV<sub>1</sub>/FVC in all subjects, non-smokers (NS), and smokers-only (S). All LOD scores >1 (including empirical p-values) are shown.

| Chromosome | cM  | Pre-bronchodilator |                  |                  | Post-bronchodilator |                  |                       |
|------------|-----|--------------------|------------------|------------------|---------------------|------------------|-----------------------|
|            |     | All                | NS               | S                | All                 | NS               | S                     |
| 1          | 18  |                    |                  | 1.14<br>(0.0073) |                     |                  |                       |
| 1          | 20  |                    |                  |                  |                     |                  | 1.19<br>(0.011)       |
| 1          | 170 |                    |                  |                  | 1.08<br>(0.016)     |                  |                       |
| 1          | 175 |                    |                  |                  |                     |                  | 1.95<br>(0.0015)      |
| 2          | 83  |                    | 1.26<br>(0.0076) |                  |                     | 1.20<br>(0.012)  |                       |
| 2          | 245 | 1.53<br>(0.0035)   |                  |                  |                     |                  |                       |
| 3          | 28  |                    |                  |                  | 1.13<br>(0.014)     | 1.23<br>(0.011)  |                       |
| 3          | 190 |                    | 1.00<br>(0.016)  |                  |                     |                  |                       |
| 4          | 95  | 1.50<br>(0.0038)   | 1.50<br>(0.0040) |                  | 1.25<br>(0.011)     | 1.22<br>(0.012)  |                       |
| 4          | 135 |                    |                  |                  | 1.18<br>(0.012)     |                  |                       |
| 4          | 152 |                    |                  | 1.19<br>(0.0060) |                     |                  |                       |
| 4          | 155 |                    |                  |                  |                     |                  | 1.38<br>(0.0065)      |
| 5          | 49  |                    |                  |                  |                     |                  | 3.27<br>( $<0.0001$ ) |
| 5          | 122 |                    |                  |                  |                     | 1.08<br>(0.017)  |                       |
| 6          | 68  |                    | 1.07<br>(0.013)  |                  |                     | 1.22<br>(0.012)  |                       |
| 6          | 96  |                    |                  | 1.02<br>(0.0112) |                     |                  |                       |
| 7          | 74  | 1.15<br>(0.0097)   | 1.27<br>(0.0075) |                  | 1.40<br>(0.0071)    | 1.34<br>(0.0085) |                       |
| 9          | 72  |                    |                  | 1.52<br>(0.0020) |                     |                  | 1.25<br>(0.0093)      |
| 13         | 41  |                    | 1.15<br>(0.011)  |                  |                     |                  |                       |
| 16         | 10  |                    |                  |                  |                     |                  | 1.20<br>(0.011)       |

|    |     |  |  |                  |                 |                  |                  |
|----|-----|--|--|------------------|-----------------|------------------|------------------|
| 17 | 51  |  |  | 1.33<br>(0.0036) |                 |                  | 1.33<br>(0.0075) |
| 18 | 118 |  |  |                  |                 | 1.46<br>(0.0058) |                  |
| 20 | 106 |  |  |                  | 1.03<br>(0.018) |                  |                  |

Supplementary Table 3: Genomewide linkage analysis for bronchodilator responsiveness (BDR) in all subjects, non-smokers (NS), and in smokers-only (S). All LOD scores >1 (including empirical p-values) are shown.

| Chromosome | cM  | BDR base*        |                  |                 | BDR pred*        |                  |                 | BDR abs*         |                  |                 |
|------------|-----|------------------|------------------|-----------------|------------------|------------------|-----------------|------------------|------------------|-----------------|
|            |     | All              | NS               | S               | All              | NS               | S               | All              | NS               | S               |
| 3          | 44  |                  |                  |                 |                  |                  |                 |                  |                  | 1.13<br>(0.022) |
| 4          | 70  | 1.26<br>(0.0081) | 1.48<br>(0.0030) |                 | 1.07<br>(0.011)  | 1.27<br>(0.0063) |                 |                  | 1.07<br>(0.0076) |                 |
| 5          | 167 |                  |                  | 1.12<br>(0.028) |                  |                  | 1.11<br>(0.023) |                  |                  | 1.15<br>(0.021) |
| 9          | 49  | 1.12<br>(0.012)  | 1.43<br>(0.0035) |                 | 1.25<br>(0.0066) | 1.54<br>(0.0027) |                 | 1.53<br>(0.0032) | 1.72<br>(0.0008) |                 |
| 10         | 31  |                  | 1.59<br>(0.0021) |                 |                  | 1.69<br>(0.0016) |                 |                  | 1.63<br>(0.0011) |                 |
| 11         | 118 |                  |                  | 1.19<br>(0.024) |                  |                  | 1.15<br>(0.021) |                  |                  |                 |
| 12         | 149 |                  |                  | 1.10<br>(0.029) |                  |                  | 1.09<br>(0.024) |                  |                  | 1.11<br>(0.022) |
| 13         | 10  | 1.04<br>(0.015)  |                  |                 | 1.12<br>(0.0097) |                  |                 |                  |                  |                 |
| 16         | 66  |                  |                  | 1.31<br>(0.019) |                  |                  | 1.22<br>(0.018) |                  |                  | 1.60<br>(0.012) |
| 17         | 67  |                  | 1.11<br>(0.0094) |                 |                  | 1.32<br>(0.0054) |                 |                  |                  |                 |
| 20         | 26  |                  |                  |                 | 1.11<br>(0.010)  |                  |                 | 1.17<br>(0.0098) |                  |                 |

\*Definitions of BDR phenotypes:

$$\text{BDRbase} = (\text{FEV}_{1\text{postbronchodilator}} - \text{FEV}_{1\text{prebronchodilator}}) / \text{FEV}_{1\text{prebronchodilator}} \times 100\%$$

$$\text{BDRpred} = (\text{FEV}_{1\text{postbronchodilator}} - \text{FEV}_{1\text{prebronchodilator}}) / \text{FEV}_{1\text{predicted}} \times 100\%$$

$$\text{BDRabs} = (\text{FEV}_{1\text{postbronchodilator}} - \text{FEV}_{1\text{prebronchodilator}})$$

All three BDR variables were  $\log_{10}$ -transformed for analysis.
